# Supplementary material for: Phospholipid Biosynthesis Genes and Susceptibility to Obesity: Analysis of Expression and Polymorphisms
Source: PLOS journal article supplement (doi:10.1371/journal.pone.0065303), 2013-05-28

**Figure S2: Linkage Disequilibrium among SNPs in *PEMT* gene.** Top graph also indicates association of *PEMT* SNPs with WHR (adjusted for BMI) in Caucasian subjects from the GIANT consortium.

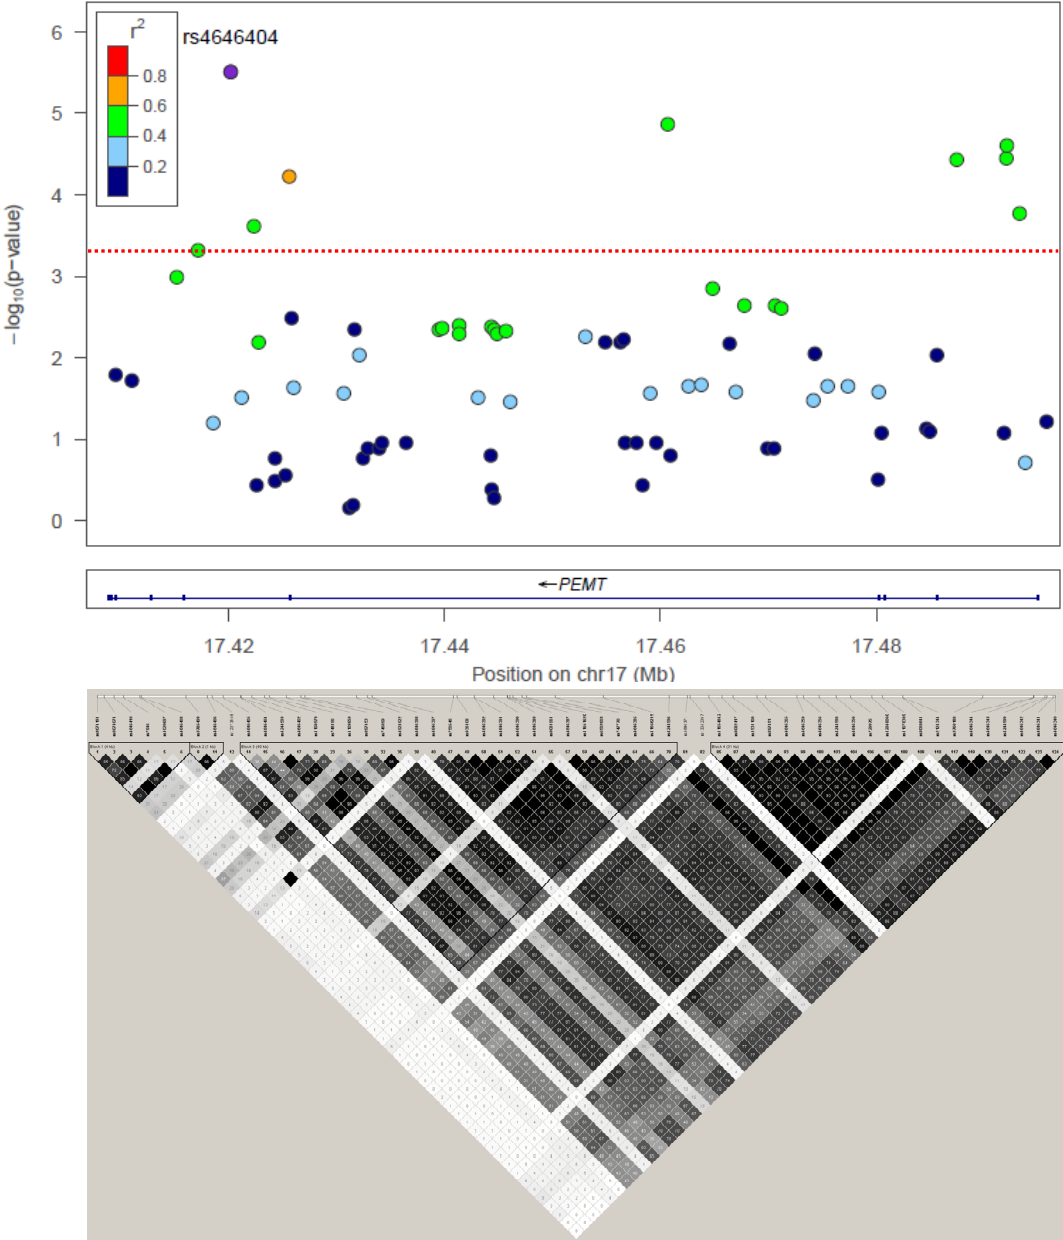

Supplement: S2 (10.1371/journal.pone.0065303.s002) [file journal.pone.0065303.s002]
