# Supplementary material for: Phospholipid Biosynthesis Genes and Susceptibility to Obesity: Analysis of Expression and Polymorphisms
Source: PLOS journal article supplement (doi:10.1371/journal.pone.0065303), 2013-05-28

**Figure S3: SNPs in *PEMT* gene region ( $\pm 500$  Kb) are associated with waist-to-hip ratio (WHR) adjusted for BMI.** Data represents a meta-analysis of 77158 Caucasian subjects from the GIANT consortium.

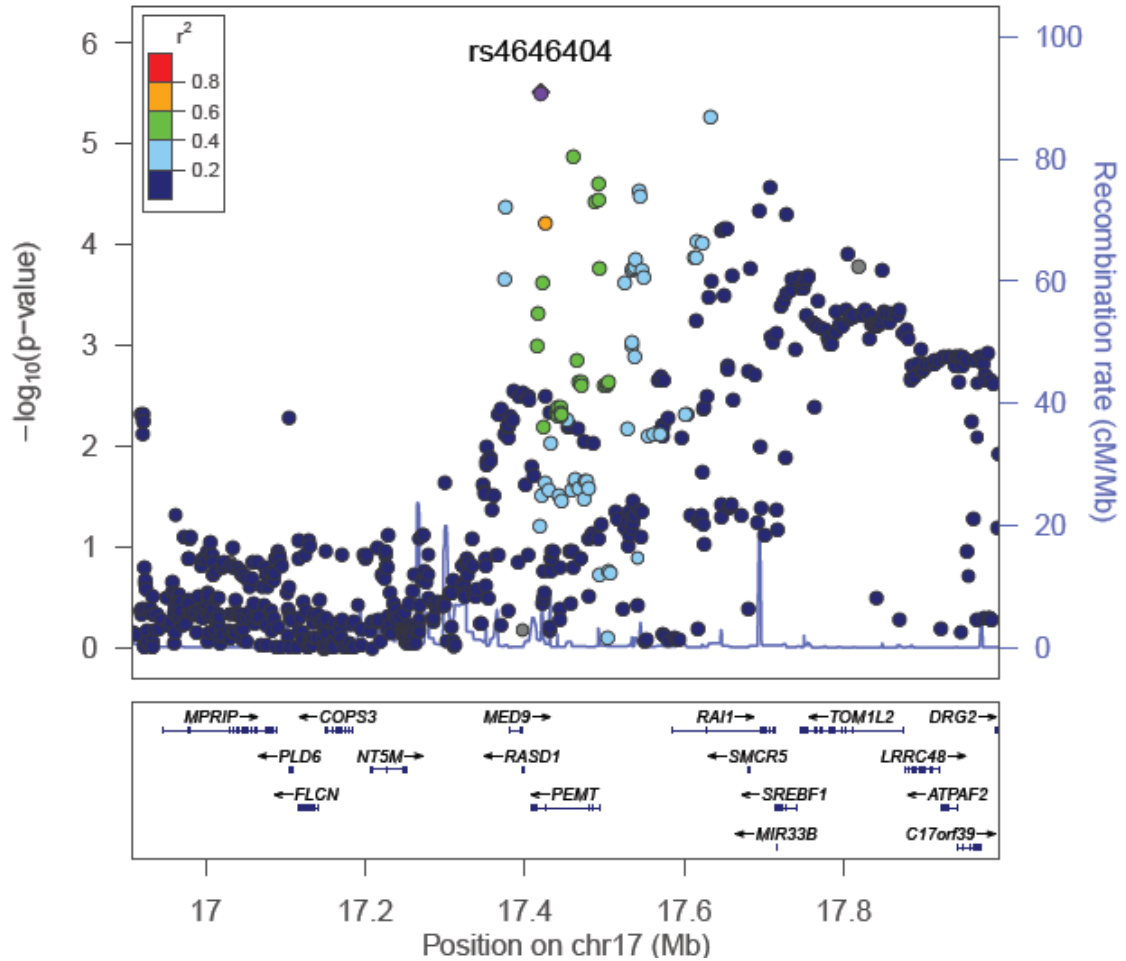

Supplement: S3 (10.1371/journal.pone.0065303.s003) [file journal.pone.0065303.s003]
