# Supplementary material for: Phospholipid Biosynthesis Genes and Susceptibility to Obesity: Analysis of Expression and Polymorphisms
Source: PLOS journal article supplement (doi:10.1371/journal.pone.0065303), 2013-05-28

**Figure S4: Association of *PEMT* expression with local SNP genotype in MuTHER**

**consortium-TwinUK data set.** A) Expression of *PEMT* (Illumina expression probe ILMN\_1745806) in adipose is associated with local regulatory SNPs and association peaks within the intron of *PEMT*. Association of 540 SNPs within  $\pm 500$  Kb of *PEMT* gene is shown (Data downloaded from Genevar database; Grundberg E et al, Nature genetics 2012; 44:1084-9). B) WHR associated intronic SNP rs4646343 is an adipose tissue specific *cis*-regulator for *PEMT* and not for any other gene within  $\pm 500$  Kb. A, adipose; L, transformed lymphocyte; S, skin fibroblast.

**A:**

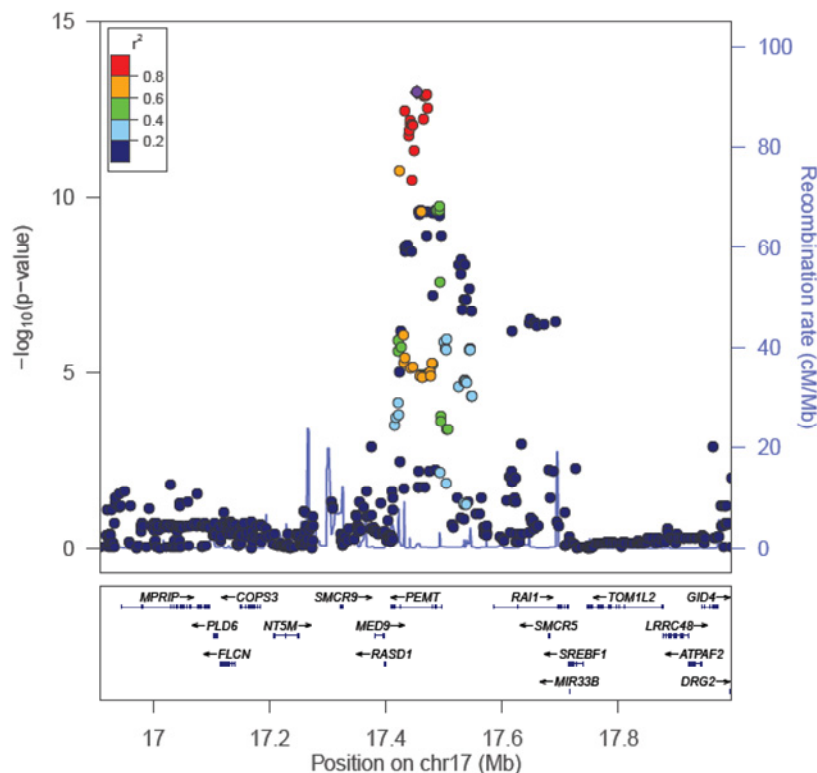

**B:**

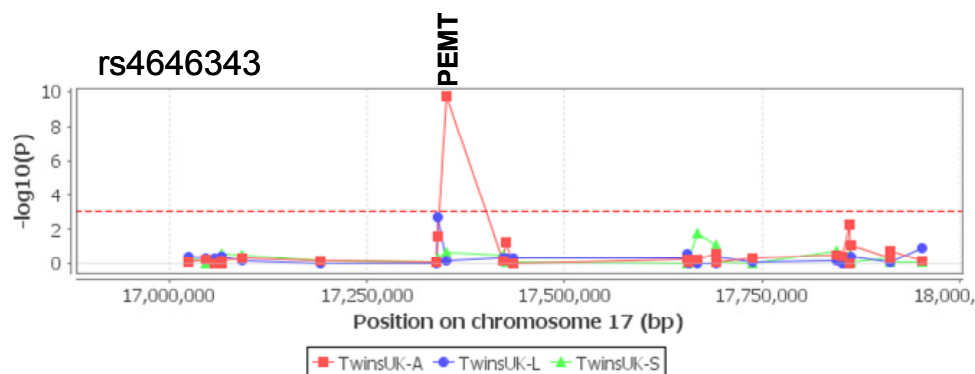

Supplement: S4 (10.1371/journal.pone.0065303.s004) [file journal.pone.0065303.s004]
